# Supplementary material
Source: publisher figshare collection journal article supplement (https://wiley.figshare.com/articles/dataset/_/3522596)
Supplement: Supplementary file 1 [file 1 › appendix-A.htm]

Ecological Archives E084-017-A1


### *Ecological Archives* E084-017-A1

### **Stephen P. Ellner and Gregor Fussmann. 2003. Effects of successional dynamics on metapopulation persistence. *Ecology* 84:882–889.**

Appendix A. Technical details
of the models. A pdf
version is also available.

*Colonization model*

The colonization rate model can
be derived from the following assumptions. It's an entirely standard stochastic
colonization model, so if the description in the text made sense to you, it's
safe to skip this section. Otherwise, an introductory text on stochastic processes
(e.g., Grimmett and Stirzaker 1992, section 6.8 and associated homework exercises)
can be consulted for background information on Poisson processes.

We assume that the times at which
an Occupied patch emits colonists is given by a Poisson point process on the
line with constant intensity *Q*, resulting from a constant number of individuals
in the patch with a constant propensity to migrate. Because our model classifies
patches by successional state without tracking population dynamics, the value
of *Q* is assumed to be the same for all Occupied patches and constant
over time. Thus, when there are *m* occupied patches, the departure times
of migrants from all patches combined is a Poisson point process with intensity
*Qm*.

In the nonspatial model, emigrants
are dispersed uniformly at random over the entire territory occupied by the
population. Each emigrant has some probability *a* of entering any given
patch (hence probability *Na* of entering some patch, where *N* is
the total number of patches). Note that emigrants do not select among patches:
any patch, whether Vacant, Occupied, or Refractory, is equally likely to be
the recipient. Thus when *m* patches are Occupied the number of migrants
arriving into a given Vacant patch is a Poisson point process with intensity
 with *c* = *aQ*, which has the properties stated in the text.

In the spatial model, emigrants
disperse non-uniformly with a higher probability of entering nearby patches.
Consider an Occupied patch *j* emitting emigrants as a Poisson process
with rate *Q*, and a patch *i* (in any successional stage) at distance
 . The probability that an emigrant from patch *j* enters patch
*i* is assumed to be  , where   are such that the probability of an emigrant landing in some patch is
at most one:

 for all *i*, with the
sum running over all other patches in the network. Arrivals into a Vacant patch
*i* thus constitute a Poisson point process with rate  where  , corresponding to the colonization rate stated in the main text.

*Large-network deterministic approximation*

The large-network deterministic
approximation involves two assumptions. The first is to consider an effectively
infinite network, whose state is specified by  , the frequency distribution (density) of patch ages *a* at time
*t* (the age of a patch is the time since it was colonized). The second
is to assume that stage transitions (e.g., the number of vacant patches being
colonized per unit time) occur at exactly their expected rates, given the current
number of patches in each stage. Consider first the case of constant refractory
stage duration *R*. Under the stated assumptions, the age distribution
of Occupied and Refractory patches  
( ) follow the McKendrick-VonFoerster equation without mortality:

|  |  |
| --- | --- |
| . | (A.1) |

Occupied patches are "born"
as a result of colonization:

|  |  |
| --- | --- |
|  | (A.2) |

where is the total number of occupied patches. Vacant patches are added by patches
increasing in age past 1 + *R*, and lost through colonization,

|  |  |
| --- | --- |
| . | (A.3) |

Equations A.1–A.3 can be solved
numerically by considering discrete age classes and time steps of duration ,
and iterating the age-class transitions described by and the inputs and losses
specified by Eqs. A.2 and A.3. Note that Eq. A.3 is actually redundant, since
the total number of patches *N* is constant, hence .

If the duration of the refractory
period is random with exponential distribution and mean E[R], then Eqs. A.1
and A.2 still apply for Occupied patches (0 < *a* < 1), and there
are ordinary differential equations for both the Refractory and Vacant patches:

|  |  |
| --- | --- |
| . | (A.4) |

If the Refractory period is random
but non-exponentially distributed, the large-network deterministic approximation
is given by Eq. A.1 with a "mortality" term on the right-hand side
for an age-dependent "death" rate of Refractory (*a* > 1)
patches into the Vacant state. The total "death" rate then replaces
 as the input rate for *V*(*t*) in Eq. A.3.

**Literature cited**

Grimmett, G. R., and D. R. Stirzaker.1992.
Probability and Random Processes, Second edition. Oxford University Press, Oxford,
UK.

---

  
[Back to E084-017]
